# Supplementary material for: High Salt Tolerance of a Bradyrhizobium Strain and Its Promotion of the Growth of Stylosanthes guianensis
Source: PubMed Central journal article supplement (PMC5578016; doi:10.3390/ijms18081625), 2017-07-28
Supplement: ijms-18-01625-s001.pdf [file ijms-18-01625-s001.pdf]

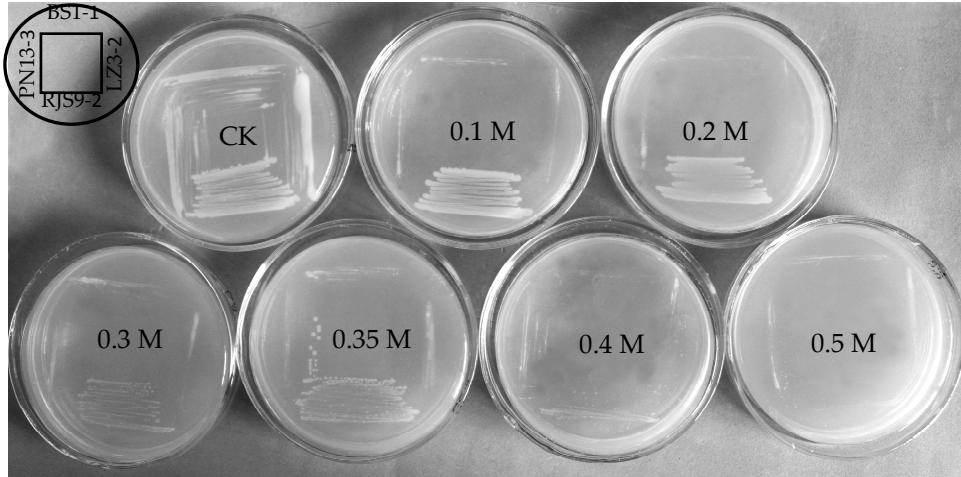

**Figure S1.** Growth performances of four *Bradyrhizobium* strains under different NaCl treatments. A single clone of the four strains was inoculated onto solid YMA medium supplied with 0.0017, 0.1, 0.2, 0.3, 0.35, 0.4 or 0.5 M NaCl. Among the different NaCl concentrations, 0.0017 M NaCl was set as the control (CK). All of the plates were incubated at 28 °C in the dark. The growth performances of the four tested strains were photographed after 6 d of NaCl treatment. Schematic diagram represents the site of the four tested *Bradyrhizobium* strains in the plate.
